# Supplementary material
Source: publisher figshare collection journal article supplement (https://diabetesjournals.figshare.com/ndownloader/files/40179796)

## Supplementary Figures

Supplementary Table 1: Median and inter-quartile range of HbA1c measurement and % with HbA1c 7.5% or less and greater than 86 mmol/mol by age and sex

| Age in years | Males |                                          |                                                            |                                                                               |                                                                                  | Females |                                          |                                                            |                                                                               |                                                                                  |
|--------------|-------|------------------------------------------|------------------------------------------------------------|-------------------------------------------------------------------------------|----------------------------------------------------------------------------------|---------|------------------------------------------|------------------------------------------------------------|-------------------------------------------------------------------------------|----------------------------------------------------------------------------------|
|              | N     | % with no HbA1c recorded in audit period | Median (IQR) latest valid HbA1c in audit period (mmol/mol) | % where the latest value in the audit period was 7.5% (58 mmol/mol) or lower* | % where the latest value in the audit period was greater than 10% (86 mmol/mol)* | N       | % with no HbA1c recorded in audit period | Median (IQR) latest valid HbA1c in audit period (mmol/mol) | % where the latest value in the audit period was 7.5% (58 mmol/mol) or lower* | % where the latest value in the audit period was greater than 10% (86 mmol/mol)* |
| 5            | 1,245 | 5.6%                                     | 59 (53-66)                                                 | 56.6%                                                                         | 2.2%                                                                             | 1,160   | 6.5%                                     | 60 (53-66)                                                 | 53.8%                                                                         | 2.9%                                                                             |
| 6            | 1,560 | 6.4%                                     | 58 (53-65)                                                 | 59.9%                                                                         | 2.1%                                                                             | 1,515   | 7.6%                                     | 59 (53-65)                                                 | 57.4%                                                                         | 2.9%                                                                             |
| 7            | 1,890 | 5.8%                                     | 59 (53-66)                                                 | 55.8%                                                                         | 2.6%                                                                             | 1,905   | 5.2%                                     | 59 (53-66)                                                 | 56.0%                                                                         | 3.1%                                                                             |
| 8            | 2,305 | 5.2%                                     | 59.6 (53-67)                                               | 55.1%                                                                         | 3.5%                                                                             | 2,270   | 5.1%                                     | 60 (54-67)                                                 | 51.9%                                                                         | 3.6%                                                                             |
| 9            | 2,690 | 5.0%                                     | 60 (54-68)                                                 | 53.1%                                                                         | 4.0%                                                                             | 2,695   | 5.0%                                     | 61 (54-68)                                                 | 49.0%                                                                         | 4.8%                                                                             |
| 10           | 3,115 | 4.8%                                     | 61 (54-69)                                                 | 47.2%                                                                         | 5.9%                                                                             | 3,100   | 4.5%                                     | 63 (55-71)                                                 | 43.8%                                                                         | 7.6%                                                                             |
| 11           | 3,455 | 3.9%                                     | 62 (55-71)                                                 | 44.0%                                                                         | 8.5%                                                                             | 3,410   | 4.7%                                     | 63 (56-73)                                                 | 40.8%                                                                         | 10.6%                                                                            |
| 12           | 3,770 | 4.5%                                     | 64 (56-73)                                                 | 41.9%                                                                         | 11.3%                                                                            | 3,600   | 3.9%                                     | 63 (55-74)                                                 | 42.3%                                                                         | 14.3%                                                                            |
| 13           | 4,120 | 4.1%                                     | 64 (56-76)                                                 | 40.9%                                                                         | 16.3%                                                                            | 3,785   | 3.4%                                     | 64 (55-75)                                                 | 42.9%                                                                         | 16.5%                                                                            |
| 14           | 4,420 | 3.8%                                     | 65 (56-77)                                                 | 40.1%                                                                         | 18.4%                                                                            | 3,865   | 2.6%                                     | 65 (56-78)                                                 | 40.1%                                                                         | 20.0%                                                                            |
| 15           | 4,690 | 3.9%                                     | 66 (56-79)                                                 | 39.1%                                                                         | 22.0%                                                                            | 3,960   | 3.9%                                     | 66 (57-81)                                                 | 38.1%                                                                         | 25.0%                                                                            |
| 16           | 4,980 | 5.8%                                     | 67 (56-82)                                                 | 41.9%                                                                         | 29.0%                                                                            | 4,165   | 4.0%                                     | 68 (58-84)                                                 | 36.3%                                                                         | 30.4%                                                                            |
| 17           | 5,365 | 9.0%                                     | 68 (57-85)                                                 | 37.0%                                                                         | 31.4%                                                                            | 4,455   | 7.6%                                     | 71 (59-88)                                                 | 32.0%                                                                         | 35.1%                                                                            |
| 18           | 5,710 | 16.2%                                    | 70 (58-87)                                                 | 31.5%                                                                         | 31.3%                                                                            | 4,745   | 14.0%                                    | 74 (61-90.2)                                               | 23.7%                                                                         | 35.8%                                                                            |
| 19           | 6,060 | 22.3%                                    | 72 (59-89)                                                 | 24.3%                                                                         | 28.7%                                                                            | 4,905   | 17.3%                                    | 74 (62-92)                                                 | 19.4%                                                                         | 31.8%                                                                            |
| 20           | 6,235 | 21.7%                                    | 72 (59-88)                                                 | 23.6%                                                                         | 27.5%                                                                            | 5,135   | 17.3%                                    | 74 (62-91)                                                 | 18.7%                                                                         | 30.3%                                                                            |
| 21           | 6,460 | 22.3%                                    | 72 (59-88)                                                 | 23.7%                                                                         | 27.0%                                                                            | 5,195   | 16.7%                                    | 73 (61-90)                                                 | 20.1%                                                                         | 29.0%                                                                            |
| 22           | 6,585 | 20.3%                                    | 71 (59-87)                                                 | 24.4%                                                                         | 25.5%                                                                            | 5,410   | 15.6%                                    | 72 (61-88)                                                 | 21.2%                                                                         | 26.8%                                                                            |
| 23           | 6,730 | 20.8%                                    | 71 (59-87)                                                 | 24.6%                                                                         | 25.8%                                                                            | 5,465   | 14.5%                                    | 71 (60-87)                                                 | 22.7%                                                                         | 26.0%                                                                            |
| 24           | 6,865 | 20.8%                                    | 70 (58-86)                                                 | 25.8%                                                                         | 24.3%                                                                            | 5,690   | 15.7%                                    | 70 (58-85)                                                 | 25.3%                                                                         | 23.5%                                                                            |

|    |       |       |            |       |       |       |       |              |       |       |
|----|-------|-------|------------|-------|-------|-------|-------|--------------|-------|-------|
| 25 | 7,075 | 19.3% | 70 (58-86) | 27.2% | 24.4% | 5,780 | 15.1% | 69 (58-84)   | 25.8% | 22.0% |
| 26 | 7,365 | 19.4% | 69 (57-85) | 28.4% | 22.5% | 5,900 | 15.2% | 68 (58-84)   | 27.4% | 22.1% |
| 27 | 7,390 | 19.3% | 68 (57-84) | 29.0% | 21.5% | 5,850 | 14.4% | 68 (57-83)   | 29.1% | 20.6% |
| 28 | 7,420 | 17.9% | 68 (57-83) | 28.8% | 21.5% | 5,855 | 13.3% | 67 (56-81.4) | 30.5% | 19.8% |
| 29 | 7,405 | 18.7% | 68 (57-83) | 29.6% | 21.5% | 5,875 | 13.1% | 67 (56-81)   | 31.6% | 18.8% |
| 30 | 7,610 | 17.9% | 68 (57-83) | 28.5% | 21.1% | 5,840 | 13.1% | 66 (56-82)   | 31.5% | 19.4% |

\* as a percentage of people with a valid HbA1c recorded

**Figure S1: Relative risk of having a HbA1c  $\leq 7.5\%$  (58 mmol/mol) by age adjusted for ethnicity, social deprivation and duration of diabetes**

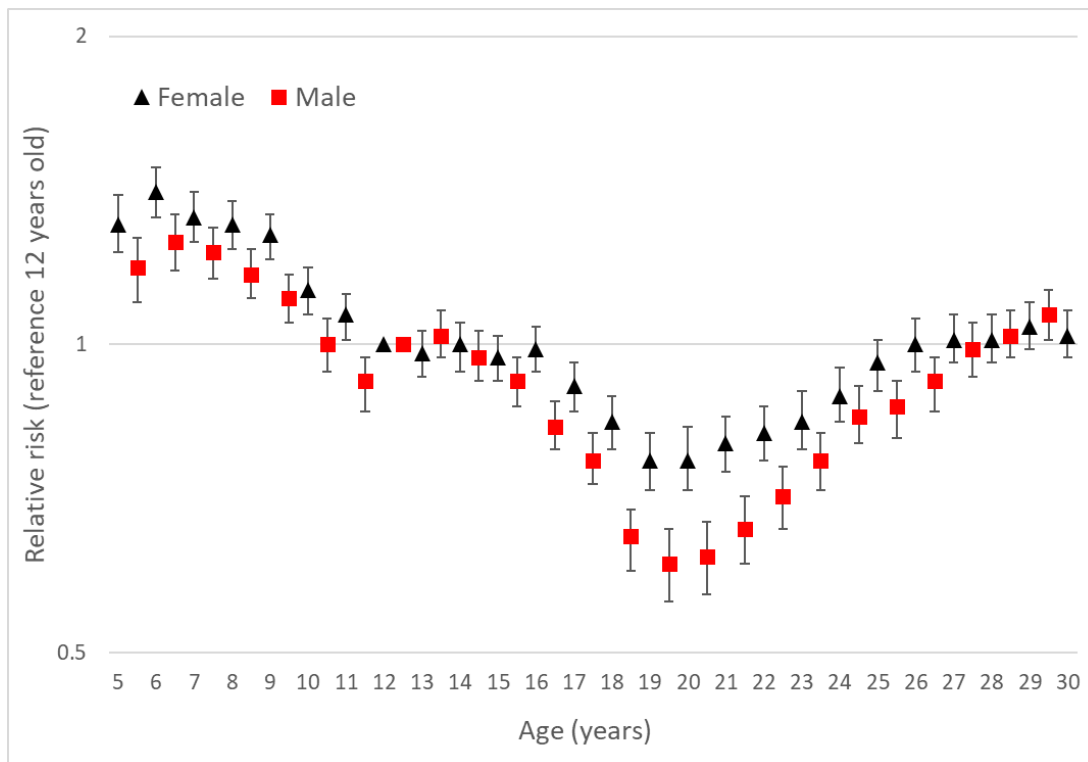

**Figure S2: Relative risk of having a HbA1c  $> 10\%$  (86 mmol/mol) by age adjusted for ethnicity, social deprivation and duration of diabetes**

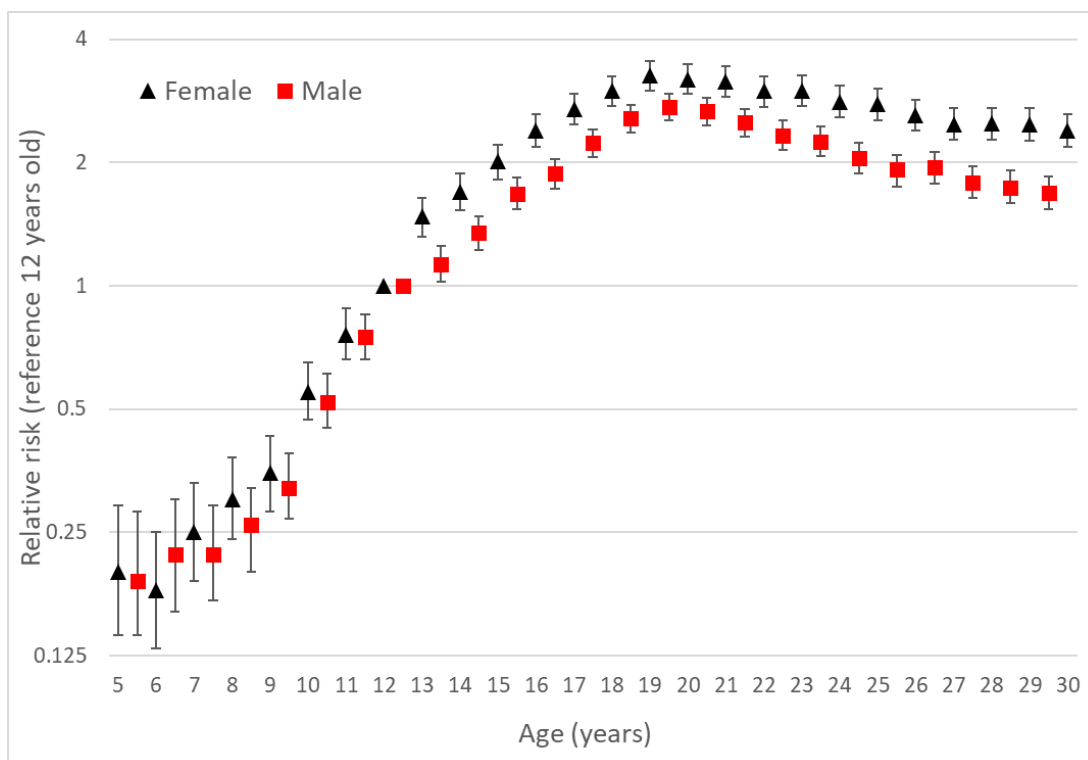

Supplement: Supplementary file 1 [file 40179796]
